# Supplementary material for: Novel functional small RNAs are selectively loaded onto mammalian Ago1
Source: PubMed Central journal article supplement (PMC4005649; doi:10.1093/nar/gku137), 2014-03-13
Supplement: supp_gku137_nar-02493-y-2013-File009.pdf [file supp_gku137_nar-02493-y-2013-File009.pdf]

Supplemental Table1

| experiment                      | Target                                                                         | sequence                                                                    |
|---------------------------------|--------------------------------------------------------------------------------|-----------------------------------------------------------------------------|
| siRNA for knock down            | <i>Ago1</i>                                                                    | 5'-gagaagaggugcucaagaauu-3'                                                 |
|                                 | <i>Ago2</i>                                                                    | 5'-gcaggacaaagauguuuuuu-3'                                                  |
|                                 | <i>DROSHA</i>                                                                  | 5'-aaccgaagaucaccaucucuguu-3'                                               |
| Quantitative PCR                | miR-21                                                                         | forward: 5'-tagcttatcagactgatgttg-3'                                        |
|                                 | miR-155                                                                        | forward: 5'-ttaatgctaatcgtgataggggt-3'                                      |
|                                 | RNU6                                                                           | forward: 5'-cgcaaggatgacacgcaaattc-3'                                       |
|                                 | ASR1                                                                           | forward: 5'-gagaaaagctcacaagaactgc-3'                                       |
|                                 | ASR2                                                                           | forward: 5'-ccccccactgctaaatttgac-3'                                        |
|                                 | ASR3                                                                           | forward: 5'-tcccactgcttcacttgacta-3'                                        |
|                                 | ASR4                                                                           | forward: 5'-ccccactgctaaatttgact-3'                                         |
|                                 | ASR5                                                                           | forward: 5'-aagcagggtcgggcctggta-3'                                         |
|                                 | <i>GAPDH</i>                                                                   | forward: 5'-ccactcctccacctttgac-3'<br>reverse: 5'-accctgttgctgtagcca-3'     |
|                                 | <i>Ago1</i>                                                                    | forward: 5'-tagcaaattgatgcgaagtg-3'<br>reverse: 5'-caccaaagatctgaggcttg-3'  |
|                                 | <i>Ago2</i>                                                                    | forward: 5'-tagcaaattgatgcgaagtg-3'<br>reverse: 5'-gcaatagctttattcctgcc-3'  |
|                                 | <i>DROSHA</i>                                                                  | forward: 5'-tcaccatctctggaagggtc-3'<br>reverse: 5'-caaccgataaacgtaactc-3'   |
|                                 | <i>INTS5</i>                                                                   | forward: 5'-aggggacgtagccttttcttg-3'<br>reverse: 5'-agcgctcttagaccaaggac-3' |
| <i>EIF2AK3</i>                  | forward: 5'-ctgactacataggactcagtgc-3'<br>reverse: 5'-ctgtagaagcaggatgtcttcc-3' |                                                                             |
| <i>MEF2B</i>                    | forward: 5'-aaatccagatctcccgatcc-3'<br>reverse: 5'-tggcgctgttgaagatgatg-3'     |                                                                             |
| siRNA for dual luciferase assay | ASR2                                                                           | 5'-ccccacugcuaaaauugacug(dTdT)-3'                                           |
|                                 | ASR4                                                                           | 5'-ucccccacugcuaaaauugacugg(dTdT)-3'                                        |
|                                 | Mutant                                                                         | 5'-agggggacuaaaauugacgg(dTdT)-3'                                            |
|                                 | Control                                                                        | 5'-ccuacgccaccauuucgu(dTdT)-3'                                              |

Supplemental Table 2

|        | L591<br>Ago2 IP (Ct) | L591kd<br>Ago2 incorporation |
|--------|----------------------|------------------------------|
| ASR1   | undetected           | undetected                   |
| ASR2   | 23.07                | —                            |
| ASR3   | 29.81                | ↑                            |
| ASR4   | 24.43                | —                            |
| miR-21 | 19.91                | ↑                            |

Incorporation change of ASR-1-4 and mir-21 into Ago2 in Ago1 knocked down cell  
 (-): unchanged (↑): upregulated

Supplemental figure 1

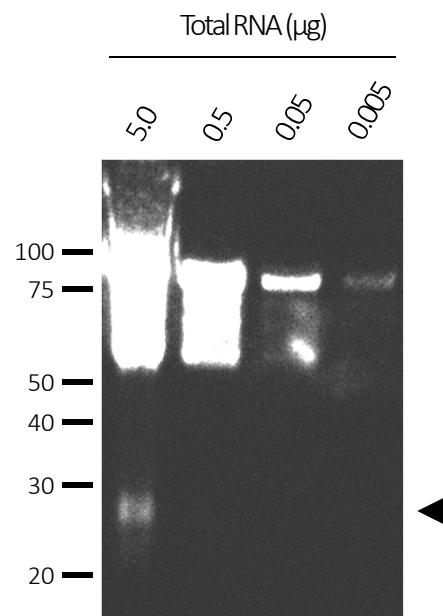

Expressions of ASR3 in L591 cells were confirmed by Northern blotting. Arrowhead indicates the mature ASR3. Serially diluted total RNAs (5.0, 0.5, 0.05, and 0.005 µg) were applied for Northern blotting.

Supplemental figure 2

| Name                | Strand | Start | p-value  | Sites                       |
|---------------------|--------|-------|----------|-----------------------------|
| chr20.fa_R_16651312 | +      | 1     | 2.32e-13 | CCCACUGCUUCACUUGACUAG UCU   |
| chr16.fa_R_489323   | +      | 1     | 2.32e-13 | CCCACUGCUUCACUUGACUAG CCA   |
| chr7.fa_F_148680922 | +      | 1     | 2.32e-13 | CCCACUGCUUCACUUGACUAG CCU   |
| chr9.fa_R_21160261  | +      | 2     | 2.32e-13 | U CCCACUGCUUCACUUGACUAG AU  |
| chr20.fa_R_16651313 | +      | 2     | 2.32e-13 | U CCCACUGCUUCACUUGACUAG UC  |
| chr9.fa_R_21160263  | +      | 4     | 2.32e-13 | ACU CCCACUGCUUCACUUGACUAG   |
| chr9.fa_R_21160262  | +      | 3     | 2.32e-13 | CU CCCACUGCUUCACUUGACUAG A  |
| chr20.fa_R_16651314 | +      | 3     | 2.32e-13 | CU CCCACUGCUUCACUUGACUAG U  |
| chr7.fa_F_148680920 | +      | 3     | 2.32e-13 | CU CCCACUGCUUCACUUGACUAG C  |
| chr7.fa_F_148680921 | +      | 2     | 2.32e-13 | U CCCACUGCUUCACUUGACUAG CC  |
| chr19.fa_R_6572994  | +      | 2     | 1.35e-12 | U CCCACUGCUUCACUUGACUAAU CC |
| chr19.fa_R_6572995  | +      | 3     | 1.35e-12 | CU CCCACUGCUUCACUUGACUAAU C |
| chr19.fa_R_6572996  | +      | 4     | 1.35e-12 | ACU CCCACUGCUUCACUUGACUAAU  |
| chr3.fa_R_38546999  | +      | 3     | 2.06e-12 | CU CCCACUGCUUCACUUGACUUGG C |
| chr3.fa_R_38547000  | +      | 4     | 2.06e-12 | ACU CCCACUGCUUCACUUGACUUGG  |
| chr5.fa_R_78466084  | +      | 2     | 3.22e-12 | U CCCACUGCUUCACUUGACUAAA CC |
| chr5.fa_R_78466085  | +      | 3     | 3.22e-12 | CU CCCACUGCUUCACUUGACUAAA C |
| chr5.fa_R_78466086  | +      | 4     | 3.22e-12 | ACU CCCACUGCUUCACUUGACUAAA  |
| chr7.fa_R_148684254 | +      | 1     | 8.91e-12 | CUCACUACUGCACUUGACUAG UCU   |
| chr7.fa_R_148684255 | +      | 2     | 8.91e-12 | U CUCACUACUGCACUUGACUAG UC  |
| chr7.fa_R_148684257 | +      | 4     | 8.91e-12 | CUU CUCACUACUGCACUUGACUAG   |
| chr5.fa_R_17117713  | +      | 3     | 8.91e-12 | UU CUCACUACUGCACUUGACUAG C  |
| chr1.fa_R_156453918 | +      | 3     | 8.91e-12 | UU CUCACUACUGCACUUGACUAG G  |
| chr7.fa_R_148684256 | +      | 3     | 8.91e-12 | UU CUCACUACUGCACUUGACUAG U  |
| chr4.fa_R_79553455  | +      | 3     | 2.05e-10 | UU CUCACUACUGCACUUGACUCA U  |
| chr4.fa_R_79553456  | +      | 4     | 2.05e-10 | CUU CUCACUACUGCACUUGACUCA   |
| chr7.fa_F_148660476 | +      | 1     | 2.56e-10 | CCCACUGCUAAAUUUGACUUGG CUU  |
| chr7.fa_F_148660475 | +      | 2     | 2.56e-10 | C CCCACUGCUAAAUUUGACUUGG CU |
| chr7.fa_F_148660474 | +      | 3     | 2.56e-10 | CC CCCACUGCUAAAUUUGACUUGG C |
| chr7.fa_F_148660473 | +      | 4     | 2.56e-10 | CCC CCCACUGCUAAAUUUGACUUGG  |
| chr7.fa_F_148638630 | +      | 3     | 1.60e-09 | CC CCCACAACCGCGCUUGACUAG C  |
| chr7.fa_F_148638629 | +      | 4     | 1.60e-09 | CCC CCCACAACCGCGCUUGACUAG   |
| chr13.fa_R_50482799 | +      | 4     | 2.10e-09 | CCC CCCACUGCUAAAUUUGAAUUGG  |
| chr8.fa_R_70602371  | +      | 1     | 1.25e-08 | GACCCUGUUGAGCUUGACUCU AGU   |
| chr8.fa_R_70602373  | +      | 3     | 1.25e-08 | AA GACCCUGUUGAGCUUGACUCU A  |
| chr1.fa_F_237766555 | +      | 4     | 1.25e-08 | GAA GACCCUGUUGAGCUUGACUCU   |
| chr1.fa_F_237766557 | +      | 2     | 1.25e-08 | A GACCCUGUUGAGCUUGACUCU AG  |

It is each sequences of the consensus motif (Figure 4c). The motif indicated significantly low E-value (1.9e-218). The consensus motif was analysed with following options: -dna -time 18000 -maxsize 60000 -mod zoops -nmotifs 3 -minw 6 -maxw 50 -revcomp.

Supplemental figure 3

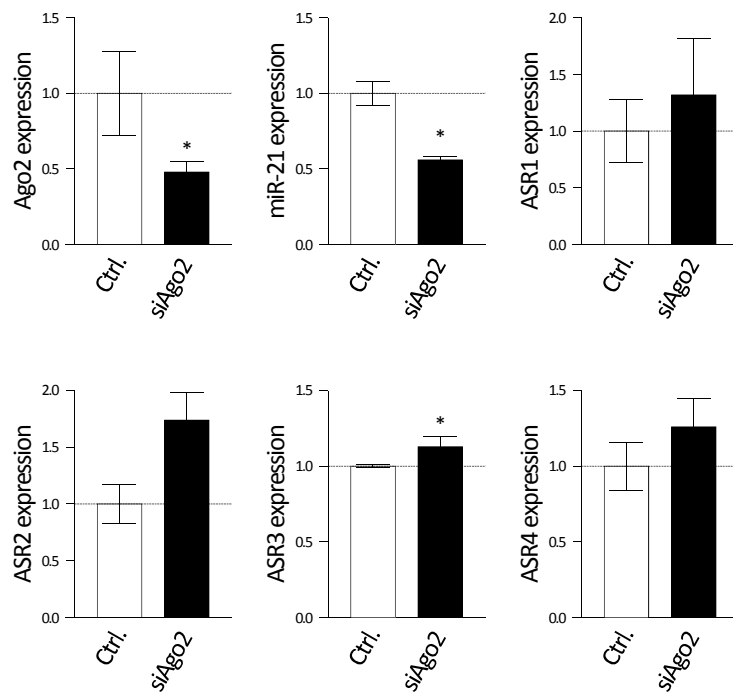

Control siRNA (Ctrl.) or siRNA targeting Ago2 (siAgo2) were transfected into L591 cells by Neon™ transfection system. Expression of Ago2 was determined 3 days after the transfection. Relative expression of miR-21, ASR1, 2, 3, and 4 were evaluated by real-time PCR 6 days after the transfection. Data were normalized with GAPDH (for Ago2) or RNU6 (for miR-21 and ASRs). Error bars indicate SD. \*:  $p$ -value < 0.05

Supplemental figure 4

| Representative target genes | Functional annotation                                                                                                           |
|-----------------------------|---------------------------------------------------------------------------------------------------------------------------------|
| SCN5A                       | Voltage-gated sodium channel activity                                                                                           |
| MEF2B                       | Sequence-specific DNA binding, transcription factor activity                                                                    |
| FAM22G                      | unknown                                                                                                                         |
| FCGBP                       | Protein binding                                                                                                                 |
| BRPF3                       | Protein binding, metal ion binding, zinc ion binding                                                                            |
| ZNF853                      | Nucleic acid binding, metal ion binding                                                                                         |
| TOLLIP                      | Signal transduction (through IL1R, Toll-Like Receptor Pathway, Toll-like receptor signaling pathway), innate immunity           |
| TTBK1                       | ATP binding, nucleotide binding, protein serine/threonine kinase activity, transferase activity                                 |
| ELFN2                       | Protein phosphatase inhibitor activity, phosphatase binding                                                                     |
| INTS5                       | Protein binding, snRNA processing                                                                                               |
| GBP1                        | GTP binding, GTPase activity, nucleotide binding                                                                                |
| EIF2AK3                     | Activation of caspase activity, ATP binding, nucleotide binding, protein serine/threonine kinase activity, transferase activity |

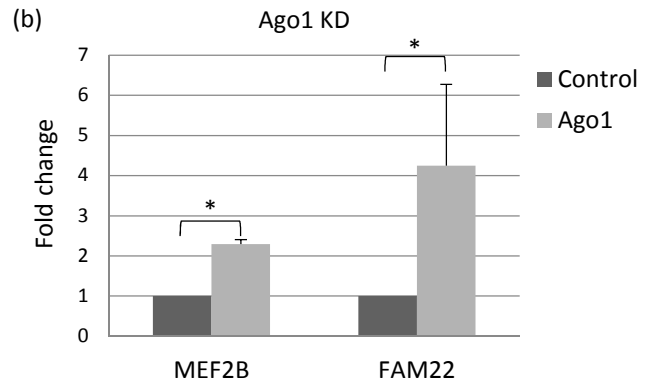

Representative predicted target genes of ASR2 and ASR4 by miLANDA are shown in the table. (left) Microarray data represents that among the target genes, MEF2B and FAM22 are highly upregulated in Ago1 -knockdown condition compared with control in L591 cells. (\* indicates  $p < 0.05$ ) (right)
